# Supplementary material for: Layer-by-layer aqueous synthesis, characterization and fluorescence properties of type-II CdTe/CdS core/shell quantum dots with near-infrared emission
Source: Royal Society of Chemistry journal article supplement (doi:10.1039/c3ra43120g), 2013-01-01
Supplement: c3ra43120g.pdf [file c3ra43120g.pdf]

## Supporting Information

### Layer-by-layer aqueous synthesis, characterization and fluorescence properties of type-II CdTe/CdS core/shell quantum dots with near-infrared emission

Rijun Gui,<sup>ab</sup> and Xueqin An,<sup>\*a</sup>

<sup>a</sup> School of Chemistry and Molecules Engineering, East China University of Science and Technology, Shanghai 200237, P.R. China

<sup>b</sup> School of Chemistry and Chemical Engineering, Shanghai Jiao Tong University, Shanghai 200240, P.R. China

\* Corresponding authors. Tel: +86 21 6425 0804; fax: +86 21 6425 2012. E-mail: anxueqin@ecust.edu.cn; jacky\_0538@163.com.

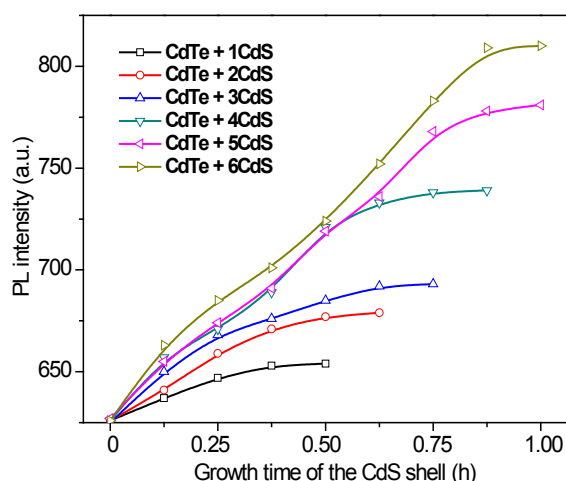

**Fig. S1** Temporal evolution of PL emission spectra of CdTe/CdS QDs with 1~6 MLs CdS shell, continuously growing for different time intervals from 0 to 1 h.

**Table S1** Detailed PL decay data of CdTe core QDs, and corresponding CdTe/CdS core/shell heterostructures with different MLs of CdS and ZnS shell.

| Sample <sup>a</sup> | $\tau_1$ (ns) | $\tau_2$ (ns) | $B_1$ | $B_2$ | $R_{\tau_1}$ (%) | $Y_0$ | $x^2$ |
|---------------------|---------------|---------------|-------|-------|------------------|-------|-------|
| CdTe                | 1.4           | 33.5          | 18.1  | 49.3  | 1.5              | 1.133 | 1.018 |
| CdTe/2CdS           | 16.3          | 58.8          | 336.6 | 121.8 | 43.3             | 1.346 | 1.075 |
| CdTe/4CdS           | 23.4          | 62.3          | 310.8 | 252.5 | 31.7             | 0.514 | 1.013 |
| CdTe/4CdS/2ZnS      | 23.6          | 79.3          | 432.8 | 400.9 | 24.3             | 0.572 | 1.007 |

<sup>a</sup> PL decay curves of QDs were plotted by bi-exponential equation, that is,  $Y = Y_0 + B_1 \exp(-x/\tau_1) + B_2 \exp(-x/\tau_2)$ . The average PL lifetime was calculated as  $\tau_a = \tau_1 \times R_{\tau_1} + \tau_2 \times (1 - R_{\tau_1})$ .

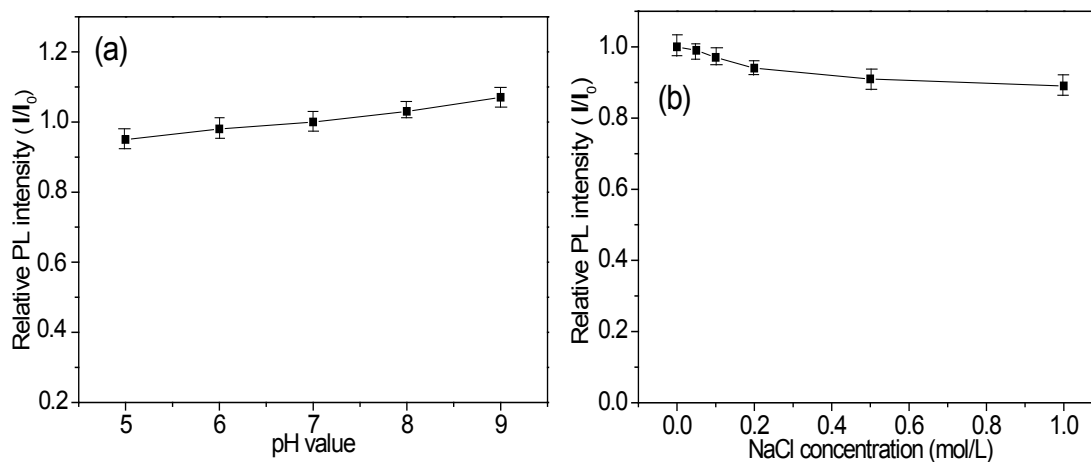

## Supporting Information

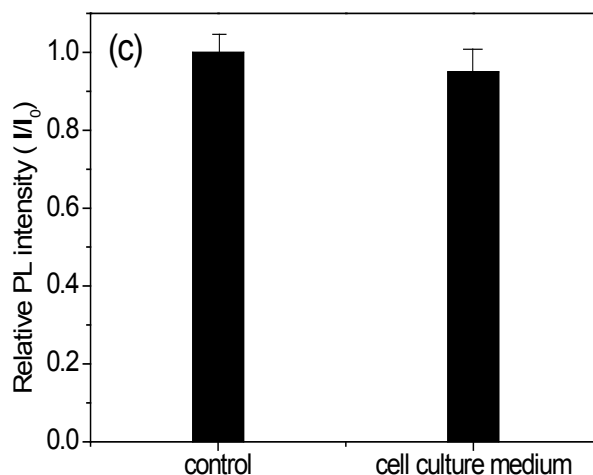

**Fig. S2** Photostability analysis of CdTe/4CdS core/shell QDs. Relative PL intensity of QDs in the presence of different substances, including (a) pHs (5~9, in 0.1 M of PBS), (b) salt solutions (NaCl, 0~1 mol/L) and (c) cell culture medium (DMEM with 10 wt% of calf serum, 100 units/mL of penicillin and 5 vol% of CO<sub>2</sub> at 37 °C), each measured after 2 h continuous irradiation.

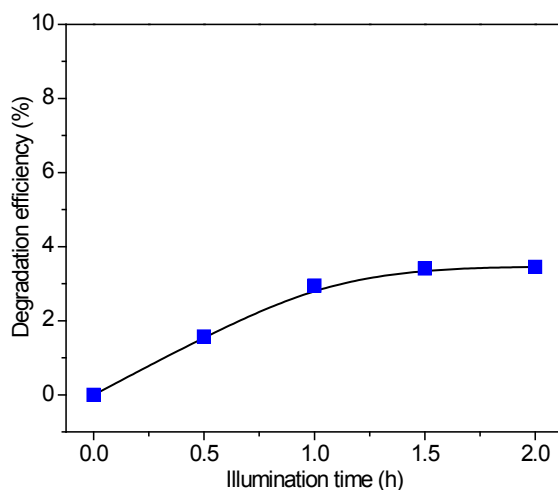

**Fig. S3** The degradation efficiency ( $E_d$ ) of Cy5.5 in the absence of the QDs as photocatalyzer dependent on different illumination time from 0 to 2 h, in a blank experiment.

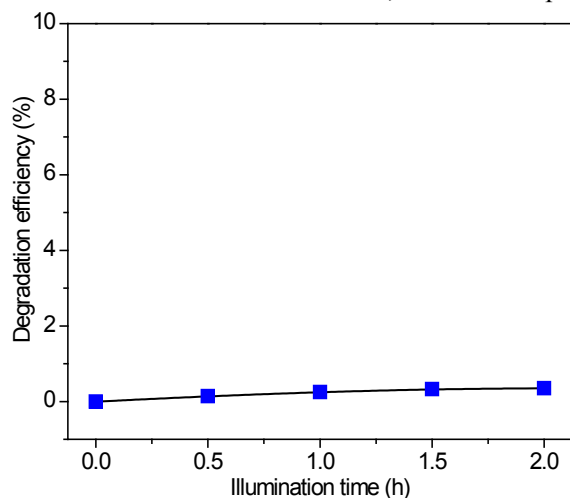

**Fig. S4** The degradation efficiency ( $E_d$ ) of Cy5.5 in the presence of GSH ligand dependent on different illumination time from 0 to 2 h, in a controlled experiment.
